# Supplementary material
Source: PubMed Central journal article supplement (PMC4826747)
Supplement: NIHMS67815-supplement-3.pdf [file NIHMS67815-supplement-3.pdf]

## Online Supplementary Material

The online supplementary material shows two movies of the  $\text{Ca}^{2+}$  events in middle cerebral arteries mounted in a wire myograph. Under control conditions (**Movie 1**) spontaneous, asynchronous propagating  $\text{Ca}^{2+}$  waves can be observed in the individual smooth muscle cells. After the addition of L-NAME, the artery contracted and developed vasomotion. Under these conditions, the synchronous  $\text{Ca}^{2+}$  oscillations were observed (**Movie 2**). See Figure 1 for traces of tension and  $[\text{Ca}^{2+}]_{\text{SMC}}$ .
